# Supplementary material for: Leaf Size Development Differences and Comparative Transcriptome Analyses of Two Poplar Genotypes
Source: MDPI journal article supplement (doi:10.3390/genes12111775), 2021-11-09
Supplement: s1 [file s1]

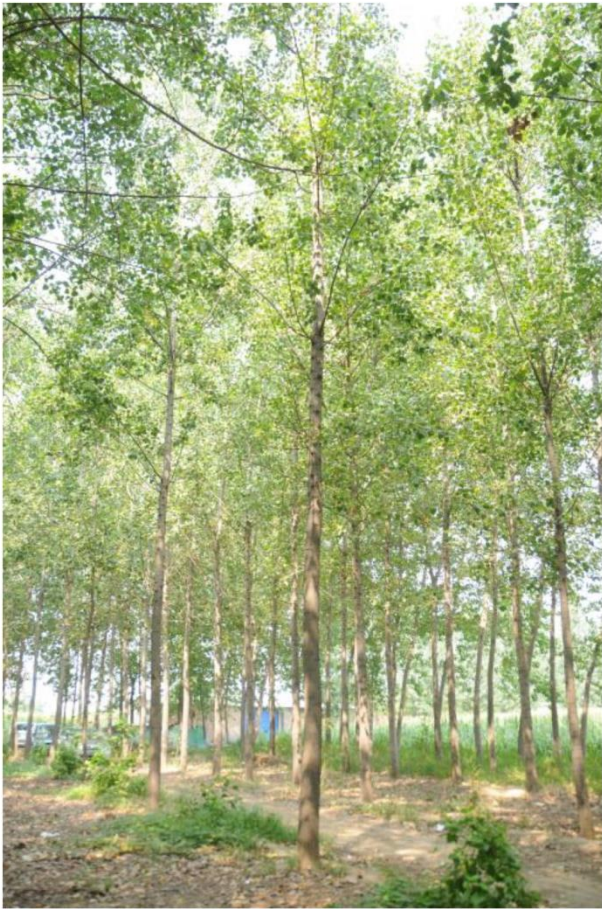

***Populus deltoides* 'Danhong'**

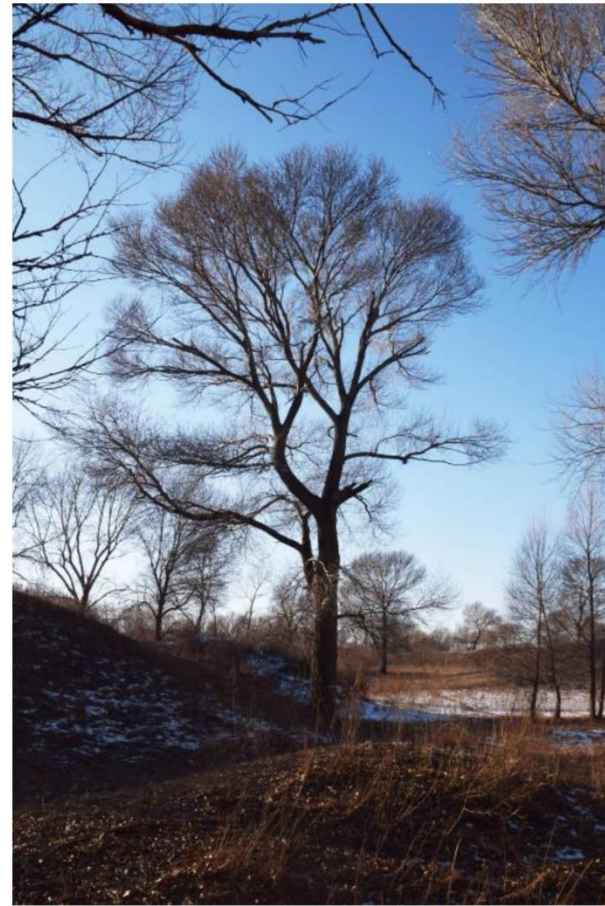

***Populus simonii* 'Tongliao1'**

Figure S1 the photo of *Populus deltoides* 'Danhong' and *Populus simonii* 'Tongliao1'.

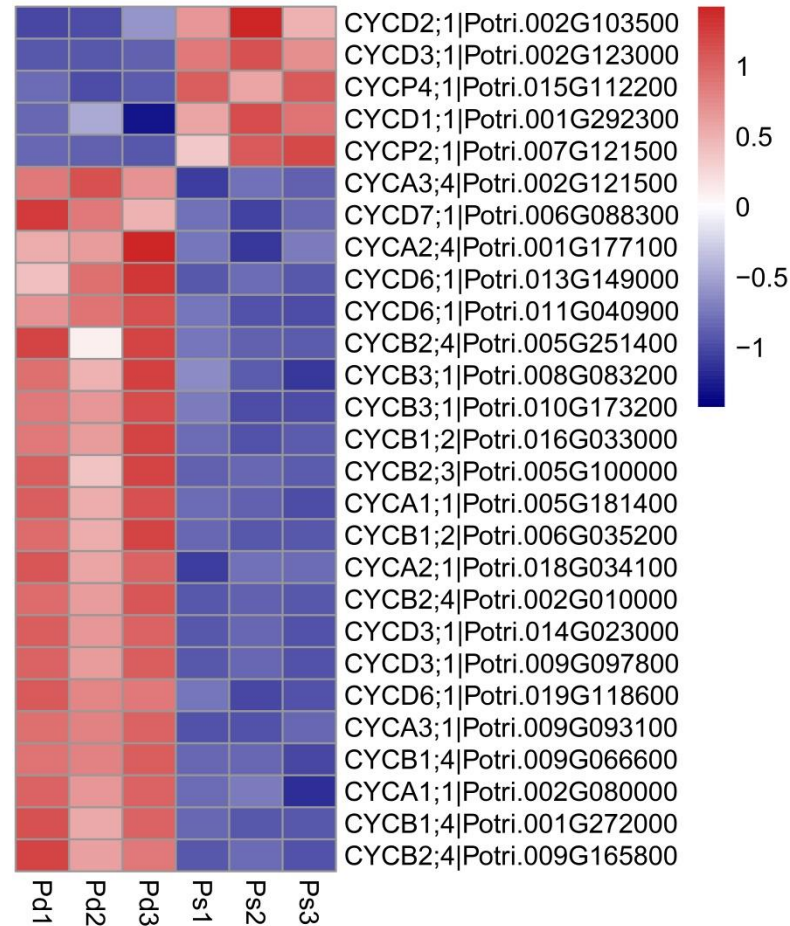

**Figure S2** The heat map of cyclin dependent kinases in *P. deltoides* 'Danhong' and *P. simonii* 'Tongliao1'.
